# Supplementary material
Source: publisher figshare collection journal article supplement (https://acs.figshare.com/ndownloader/files/9924601)
Supplement: Supplementary file 1 [file 9924601]

Enhancing mucosal immune response of Newcastle disease virus DNA vaccine using

*N*-2-hydroxypropyl trimethyl ammonium chloride chitosan and *N*, *O*-carboxymethyl chitosan

nanoparticles as delivery carrier

Kai Zhao <sup>a, #, \*</sup>, Jinyu Han <sup>b, #</sup>, Yang Zhang <sup>a</sup>, Lin Wei <sup>a</sup>, Shuang Yu <sup>a</sup>, Xiaohua Wang <sup>a</sup>, Zheng Jin <sup>b, \*</sup>, Yunfeng  
Wang <sup>c, \*</sup>

<sup>a</sup> Key Laboratory of Microbiology, School of Life Science, Heilongjiang University, Harbin 150080, China

<sup>b</sup> Key Laboratory of Chemical Engineering Process and Technology for High-efficiency Conversion, College  
of Chemistry and Material Sciences, Heilongjiang University, Harbin 150080, China

<sup>c</sup> Division of Avian Infectious Diseases, State Key Laboratory of Veterinary Biotechnology, Harbin  
Veterinary Research Institute, CAAS, Harbin 150001, China

**Running title:** Quaternized chitosan-based nanodelivery for DNA vaccine

<sup>#</sup> These authors contributed equally to this work.

<sup>\*</sup> Address correspondence to Kai Zhao, zybin395@126.com, Zheng Jin, jinzhengdvd@163.com and Yunfeng  
Wang, yfwang@hvri.ac.cn.

## Supporting Information

**Table S1** Protective efficacy of the immunized SPF chickens after being challenged with 100 µl of strain F48E9 at a viral titer of  $10^{4.5}$  EID<sub>50</sub>/0.1 ml. At two weeks post first immunization, booster immunization was performed with the same dosages and routes as the first immunization. When the levels of NDV-specific antibody in serum of every immune group increased to 6.0 log<sub>2</sub> post first immunization, seven chickens were selected randomly from each of the five groups and were infected i.m. for challenge studies.

| Groups                              | Mortality/Total | Morbidity (%) | Protective efficacy (%) |
|-------------------------------------|-----------------|---------------|-------------------------|
| PBS i.m.                            | 7/7             | 100           | 0                       |
| Blank N-2-HACC/CMC NPs i.m.         | 7/7             | 100           | 0                       |
| pVAX-F (o) DNA-C3d6 i.m.            | 4/7             | 57            | 43                      |
| N-2-HACC-CMC/pFDNA-C3d6 NPs<br>i.m. | 2/7             | 29            | 71                      |
| N-2-HACC-CMC/pFDNA-C3d6 NPs<br>i.n. | 0/7             | 0             | 100                     |
